# Supplementary material for: A simple and eco-friendly approach for the synthesis of 2-imino and 2-oxo-2H-chromene-3-carboxamides
Source: Royal Society of Chemistry journal article supplement (doi:10.1039/b807892k), 2008-01-01
Supplement: b807892k.pdf [file b807892k.pdf]

Supporting Information for:

**A simple and eco-friendly approach for the synthesis of 2-imino and 2-oxo-2*H*-chromene-3-carboxamides**

Fernanda Proença,<sup>\*a</sup> and Marta Costa<sup>b</sup>

<sup>a</sup> Centro de Química, Universidade do Minho, Campos de Gualtar, 4710-057 Braga, Portugal. Fax: 00 253 604382; Tel: 00 253 604379; E-mail: fproenca@quimica.uminho.pt

<sup>b</sup> Centro de Química, Universidade do Minho, Campos de Gualtar, 4710-057 Braga, Portugal. Fax: 00 253 604382; Tel: 00 253 604379; E-mail: martacosta@quimica.uminho.pt

**Table 3** Analytical data for compounds **3**.

| Compd <b>3</b> | R <sub>1</sub>                                                                    | R <sub>2</sub>                                                                                                            | Elemental analysis                                                                                                                                                     | mp (°C) |
|----------------|-----------------------------------------------------------------------------------|---------------------------------------------------------------------------------------------------------------------------|------------------------------------------------------------------------------------------------------------------------------------------------------------------------|---------|
| <b>a</b>       |  |                                                                                                                           | Found: C, 57.52 ; H, 7.68 ; N, 25.46. Calc. For C <sub>8</sub> H <sub>13</sub> N <sub>3</sub> O:<br>C, 57.48 ; H, 7.78 ; N, 25.15.                                     | 115-117 |
| <b>b</b>       |  |                                                                                                                           | Commercially available                                                                                                                                                 | -----   |
| <b>c</b>       | H                                                                                 | -CH <sub>2</sub> CH <sub>2</sub> OCH <sub>3</sub>                                                                         | Found: C, 50.63 ; H, 6.97 ; N, 19.44. Calc. For C <sub>6</sub> H <sub>10</sub> N <sub>2</sub> O <sub>2</sub> :<br>C, 50.70 ; H, 7.04 ; N, 19.72.                       | 84-86   |
| <b>d</b>       | H                                                                                 | -CH <sub>2</sub> CH <sub>2</sub> OH                                                                                       | Found: C, 46.24 ; H, 6.12 ; N, 21.49. Calc. For C <sub>5</sub> H <sub>8</sub><br>N <sub>2</sub> O <sub>2</sub> .0.07H <sub>2</sub> O: C, 46.42 ; H, 6.30 ; N, 21.66.   | 59-62   |
| <b>e</b>       | H                                                                                 | -CH <sub>2</sub> (CH <sub>2</sub> ) <sub>2</sub> OH                                                                       | Oil                                                                                                                                                                    | Oil     |
| <b>f</b>       | H                                                                                 | -CH <sub>2</sub> (CH <sub>2</sub> ) <sub>4</sub> OH                                                                       | Oil                                                                                                                                                                    | Oil     |
| <b>g</b>       | H                                                                                 | -CH(CH <sub>2</sub> CH <sub>3</sub> )CH <sub>2</sub> OH                                                                   | Found: C, 53.60 ; H, 7.78 ; N, 18.28. Calc. For C <sub>7</sub> H <sub>12</sub> N <sub>2</sub> O <sub>2</sub> :<br>C, 53.85 ; H, 7.69 ; N, 17.95.                       | 91-93   |
| <b>h</b>       | H                                                                                 |                                        | Found: C, 63.19 ; H, 7.73 ; N, 18.17. Calc. For C <sub>8</sub> H <sub>12</sub> N <sub>2</sub> O:<br>C, 63.16 ; H, 7.90 ; N, 18.42.                                     | 87-90   |
| <b>i</b>       | H                                                                                 |                                        | Found: C, 65.8 ; H, 8.22 ; N, 16.63. Calc. For C <sub>9</sub> H <sub>14</sub> N <sub>2</sub> O: C,<br>65.06 ; H, 8.43 ; N, 16.87.                                      | 133-135 |
| <b>j</b>       | H                                                                                 | -CH <sub>2</sub> CH(OH)CH <sub>2</sub> OH                                                                                 | Found: C, 45.44 ; H, 6.26 ; N, 17.73. Calc. For C <sub>6</sub> H <sub>10</sub> N <sub>2</sub> O <sub>3</sub> :<br>C, 45.57 ; H, 6.33 ; N, 17.72.                       | 139-143 |
| <b>k</b>       | H                                                                                 | -C(CH <sub>2</sub> OH) <sub>3</sub>                                                                                       | Found: C, 44.70 ; H, 6.36 ; N, 15.03. Calc. For C <sub>7</sub> H <sub>12</sub> N <sub>2</sub> O <sub>4</sub> :<br>C, 44.68 ; H, 6.38 ; N, 14.89.                       | 84-86   |
| <b>l</b>       | H                                                                                 | -CH <sub>2</sub> CH(Ph)OH                                                                                                 | Found: C, 64.77 ; H, 5.99 ; N, 13.46. Calc. For C <sub>11</sub> H <sub>12</sub> N <sub>2</sub> O <sub>2</sub> :<br>C, 64.71 ; H, 5.88 ; N, 13.72.                      | 105-107 |
| <b>m</b>       | H                                                                                 |                                        | Found: C, 60.22 ; H, 8.52 ; N, 20.80. Calc. For C <sub>10</sub> H <sub>17</sub> N <sub>3</sub> O:<br>C, 60.42 ; H, 8.76 ; N, 21.15.                                    | 60-63   |
| <b>n</b>       | H                                                                                 |                                        | Found: C, 60.60 ; H, 4.59 ; N, 13.03. Calc. For C <sub>11</sub> H <sub>10</sub> N <sub>2</sub> O <sub>3</sub> :<br>C, 60.55 ; H, 4.59 ; N, 12.84.                      | 139-142 |
| <b>o</b>       | H                                                                                 |                                        | Found: C, 64.15 ; H, 6.22 ; N, 13.56. Calc. For<br>C <sub>11</sub> H <sub>12</sub> N <sub>2</sub> O <sub>2</sub> .0.15H <sub>2</sub> O: C, 63.86 ; H, 5.95 ; N, 13.55. | 142-144 |
| <b>p</b>       | H                                                                                 | -CH <sub>2</sub> CH(OCH <sub>2</sub> CH <sub>3</sub> ) <sub>2</sub>                                                       | Found: C, 53.89 ; H, 8.15 ; N, 14.04. Calc. For C <sub>9</sub> H <sub>16</sub> N <sub>2</sub> O <sub>3</sub> :<br>C, 54.00 ; H, 8.00 ; N, 14.00.                       | 59-61   |
| <b>q</b>       | H                                                                                 |                                        | Found: C, 66.06 ; H, 8.75 ; N, 11.71. Calc. For<br>C <sub>13</sub> H <sub>18</sub> N <sub>2</sub> O.H <sub>2</sub> O: C, 66.10 ; H, 8.47 ; N, 11.86.                   | 215-218 |
| <b>r</b>       | H                                                                                 | -(CH <sub>2</sub> ) <sub>2</sub> NHCOCH <sub>2</sub> CN                                                                   | Found: C, 49.28 ; H, 5.24 ; N, 28.59. Calc. For C <sub>8</sub> H <sub>10</sub> N <sub>4</sub> O <sub>2</sub> :<br>C, 49.48 ; H, 5.16 ; N, 28.87.                       | 189-191 |
| <b>s</b>       | H                                                                                 | -(CH <sub>2</sub> ) <sub>3</sub> NHCOCH <sub>2</sub> CN                                                                   | Found: C, 51.83 ; H, 5.79 ; N, 26.84. Calc. For C <sub>9</sub> H <sub>12</sub> N <sub>4</sub> O <sub>2</sub> :<br>C, 51.92 ; H, 5.77 ; N, 26.92.                       | 166-168 |
| <b>t</b>       | H                                                                                 |                                        | Found: C, 56.67 ; H, 7.80 ; N, 24.52. Calc. For<br>C <sub>16</sub> H <sub>26</sub> N <sub>6</sub> O <sub>2</sub> .0.25H <sub>2</sub> O: C, 56.72 ; H, 7.83 ; N, 24.82. | 168-171 |
| <b>u</b>       | H                                                                                 | -(CH <sub>2</sub> ) <sub>3</sub> O(CH <sub>2</sub> ) <sub>4</sub> O(CH <sub>2</sub> ) <sub>3</sub> NHCOCH <sub>2</sub> CN | Found: C, 56.32 ; H, 7.69 ; N, 16.50. Calc. For<br>C <sub>16</sub> H <sub>26</sub> N <sub>4</sub> O <sub>2</sub> .0.16H <sub>2</sub> O: C, 56.32 ; H, 7.72 ; N, 16.43. | 99-102  |

**Table 4** Analytical data for compounds **5** and **6**.

| Compound 4     |                  | Compound 3 | Product 5                                                                                                                                                            | Product 6          |                                                                                                                                                                                    |         |
|----------------|------------------|------------|----------------------------------------------------------------------------------------------------------------------------------------------------------------------|--------------------|------------------------------------------------------------------------------------------------------------------------------------------------------------------------------------|---------|
| R <sub>3</sub> | R <sub>4</sub>   |            | Elemental analysis                                                                                                                                                   | Elemental analysis |                                                                                                                                                                                    |         |
|                |                  |            | mp (°C)                                                                                                                                                              | mp (°C)            |                                                                                                                                                                                    |         |
| H              | OCH <sub>3</sub> | <b>3c</b>  | Found: C, 60.34 ; H, 5.74 ; N, 10.08. Calc. For C <sub>14</sub> H <sub>16</sub> N <sub>2</sub> O <sub>4</sub> .0.1H <sub>2</sub> O: C, 60.48 ; H, 5.76 ; N, 10.08.   | 159-161            | -                                                                                                                                                                                  | -       |
| H              | OCH <sub>3</sub> | <b>3d</b>  | Found: C, 59.35 ; H, 5.46 ; N, 10.82. Calc. For C <sub>13</sub> H <sub>14</sub> N <sub>2</sub> O <sub>4</sub> : C, 59.54 ; H, 5.34 ; N, 10.69.                       | 160-162            | -                                                                                                                                                                                  | -       |
| H              | OCH <sub>3</sub> | <b>3e</b>  | Found: C, 58.75 ; H, 5.89 ; N, 9.61. Calc. For C <sub>14</sub> H <sub>16</sub> N <sub>2</sub> O <sub>4</sub> .0.5H <sub>2</sub> O: C, 58.95 ; H, 5.96 ; N, 9.82.     | 132-134            | -                                                                                                                                                                                  | -       |
| H              | OCH <sub>3</sub> | <b>3f</b>  | Found: C, 63.19 ; H, 6.46 ; N, 8.79. Calc. For C <sub>16</sub> H <sub>20</sub> N <sub>2</sub> O <sub>4</sub> .0.01H <sub>2</sub> O: C, 62.97 ; H, 6.62 ; N, 9.18.    | 122-125            | -                                                                                                                                                                                  | -       |
| H              | OCH <sub>3</sub> | <b>3g</b>  | Found: C, 60.48 ; H, 6.16 ; N, 9.13. Calc. For C <sub>15</sub> H <sub>18</sub> N <sub>2</sub> O <sub>4</sub> .0.4H <sub>2</sub> O: C, 60.56 ; H, 6.33 ; N, 9.42.     | 147-150            | -                                                                                                                                                                                  | -       |
| H              | OCH <sub>3</sub> | <b>3h</b>  | Found: C, 67.02 ; H, 6.34 ; N, 10.10. Calc. For C <sub>16</sub> H <sub>18</sub> N <sub>2</sub> O <sub>3</sub> : C, 67.13 ; H, 6.29 ; N, 9.79.                        | 128-130            | -                                                                                                                                                                                  | -       |
| H              | OCH <sub>3</sub> | <b>3i</b>  | Found: C, 64.20 ; H, 7.06 ; N, 9.17. Calc. For C <sub>17</sub> H <sub>20</sub> N <sub>2</sub> O <sub>3</sub> .0.9H <sub>2</sub> O: C, 64.52 ; H, 6.89 ; N, 8.86.     | 101-103            | -                                                                                                                                                                                  | -       |
| H              | OCH <sub>3</sub> | <b>3j</b>  | Found: C, 54.24 ; H, 5.73 ; N, 8.76. Calc. For C <sub>14</sub> H <sub>16</sub> N <sub>2</sub> O <sub>5</sub> .H <sub>2</sub> O: C, 54.19 ; H, 5.81 ; N, 9.03.        | 92-95              | Found: C, 57.36 ; H, 5.42 ; N, 5.05. Calc. For C <sub>14</sub> H <sub>15</sub> NO <sub>6</sub> : C, 57.34 ; H, 5.12 ; N, 4.78.                                                     | 188-189 |
| H              | OCH <sub>3</sub> | <b>3k</b>  | Found: C, 55.48 ; H, 5.54 ; N, 8.39. Calc. For C <sub>15</sub> H <sub>18</sub> N <sub>2</sub> O <sub>6</sub> .0.1H <sub>2</sub> O: C, 55.59 ; H, 5.62 ; N, 8.65.     | 201-293            | -                                                                                                                                                                                  | -       |
| H              | OCH <sub>3</sub> | <b>3l</b>  | Found: C, 67.05 ; H, 5.42 ; N, 8.14. Calc. For C <sub>19</sub> H <sub>18</sub> N <sub>2</sub> O <sub>4</sub> .0.1H <sub>2</sub> O: C, 67.10 ; H, 5.36 ; N, 8.24.     | 159-160            | -                                                                                                                                                                                  | -       |
| H              | OCH <sub>3</sub> | <b>3n</b>  | Found: C, 63.85 ; H, 4.82 ; N, 8.10. Calc. For C <sub>19</sub> H <sub>16</sub> N <sub>2</sub> O <sub>5</sub> .0.2H <sub>2</sub> O: C, 64.12 ; H, 4.61 ; N, 7.87.     | 236-238            | -                                                                                                                                                                                  | -       |
| H              | OCH <sub>3</sub> | <b>3o</b>  | Found: C, 67.27 ; H, 5.28 ; N, 7.96. Calc. For C <sub>19</sub> H <sub>18</sub> N <sub>2</sub> O <sub>4</sub> : C, 67.46 ; H, 5.32 ; N, 8.28.                         | 156-158            | -                                                                                                                                                                                  | -       |
| H              | OCH <sub>3</sub> | <b>3p</b>  | Found: C, 57.49 ; H, 6.96 ; N, 8.09. Calc. For C <sub>17</sub> H <sub>22</sub> N <sub>2</sub> O <sub>5</sub> 1.1H <sub>2</sub> O: C, 57.66 ; H, 6.84 ; N, 7.91.      | 101-103            | Found: C, 60.28 ; H, 6.52 ; N, 4.57. Calc. For C <sub>17</sub> H <sub>21</sub> NO <sub>6</sub> .0.2NH <sub>3</sub> : C, 60.28 ; H, 6.38 ; N, 4.96.                                 | 104-105 |
| H              | OCH <sub>3</sub> | <b>3s</b>  | Found: C, 60.95 ; H, 5.27 ; N, 11.30. Calc. For C <sub>25</sub> H <sub>24</sub> N <sub>4</sub> O <sub>6</sub> .0.9H <sub>2</sub> O: C, 60.95 ; H, 5.24 ; N, 11.38.   | 201-203            | -                                                                                                                                                                                  | -       |
| H              | OCH <sub>3</sub> | <b>3t</b>  | Found: C, 60.99 ; H, 6.69 ; N, 13.63. Calc. For C <sub>32</sub> H <sub>38</sub> N <sub>6</sub> O <sub>6</sub> .1.5H <sub>2</sub> O: C, 61.05 ; H, 6.52 ; N, 13.35.   | 167-169            | -                                                                                                                                                                                  | -       |
| H              | OCH <sub>3</sub> | <b>3u</b>  | Found: C, 60.91 ; H, 6.62 ; N, 9.16. Calc. For C <sub>32</sub> H <sub>38</sub> N <sub>4</sub> O <sub>8</sub> .1.3H <sub>2</sub> O: C, 61.01 ; H, 6.45 ; N, 8.90.     | 69-72              | -                                                                                                                                                                                  | -       |
| H              | OH               | <b>3j</b>  | -                                                                                                                                                                    | -                  | Found: C, 55.52 ; H, 4.74 ; N, 4.92. Calc. For C <sub>13</sub> H <sub>13</sub> NO <sub>6</sub> : C, 55.91 ; H, 4.66 ; N, 5.02.                                                     | 200-202 |
| H              | H                | <b>3c</b>  | Found: C, 63.31 ; H, 5.71 ; N, 11.24. Calc. For C <sub>13</sub> H <sub>14</sub> N <sub>2</sub> O <sub>3</sub> : C, 63.39 ; H, 5.74 ; N, 11.38.                       | 91-94              | Found: C, 63.03 ; H, 5.33 ; N, 5.74. Calc. For C <sub>13</sub> H <sub>13</sub> NO <sub>4</sub> : C, 63.14 ; H, 5.31 ; N, 5.67.                                                     | 118-122 |
| H              | H                | <b>3g</b>  | Found: C, 64.01 ; H, 6.17 ; N, 10.45. Calc. For C <sub>14</sub> H <sub>16</sub> N <sub>2</sub> O <sub>3</sub> .0.1H <sub>2</sub> O: C, 64.09 ; H, 6.18 ; N, 10.45.   | 94-98              | Found: C, 64.13 ; H, 5.69 ; N, 5.31. Calc. For C <sub>14</sub> H <sub>15</sub> NO <sub>4</sub> : C, 64.35 ; H, 5.80 ; N, 5.36.                                                     | 119-123 |
| H              | H                | <b>3j</b>  | -                                                                                                                                                                    | -                  | Found: C, 59.00 ; H, 4.97 ; N, 5.34. Calc. For C <sub>13</sub> H <sub>13</sub> NO <sub>5</sub> : C, 59.30 ; H, 4.99 ; N, 5.32.                                                     | 178-182 |
| H              | H                | <b>3t</b>  | -                                                                                                                                                                    | -                  | Found: C, 57.53 ; H, 6.42 ; N, 9.65. Calc. For C <sub>30</sub> H <sub>32</sub> N <sub>4</sub> O <sub>6</sub> .0.4NH <sub>3</sub> .4H <sub>2</sub> O: C, 57.86 ; H, 6.62 ; N, 9.90. | 193-199 |
| Cl             | H                | <b>3c</b>  | Found: C, 55.36 ; H, 4.86 ; N, 10.04. Calc. For C <sub>13</sub> H <sub>13</sub> N <sub>2</sub> O <sub>3</sub> Cl: C, 55.62 ; H, 4.63 ; N, 9.98.                      | 163-166            | -                                                                                                                                                                                  | -       |
| Cl             | H                | <b>3j</b>  | -                                                                                                                                                                    | -                  | Found: C, 52.15 ; H, 4.20 ; N, 4.95. Calc. For C <sub>13</sub> H <sub>12</sub> NO <sub>3</sub> Cl: C, 52.44 ; H, 4.03 ; N, 4.71.                                                   | 184-186 |
| Cl             | H                | <b>3g</b>  | Found: C, 55.91 ; H, 4.91 ; N, 9.09. Calc. For C <sub>14</sub> H <sub>15</sub> N <sub>2</sub> O <sub>3</sub> Cl.0.3H <sub>2</sub> O: C, 56.02 ; H, 5.20 ; N, 9.34.   | 105-107            | -                                                                                                                                                                                  | -       |
| Br             | H                | <b>3c</b>  | Found: C, 47.84 ; H, 3.93 ; N, 8.56. Calc. For C <sub>13</sub> H <sub>13</sub> N <sub>2</sub> O <sub>3</sub> .Br: C, 48.02 ; H, 4.00 ; N, 8.62.                      | 176-178            | Found: C, 47.74 ; H, 3.53 ; N, 4.47. Calc. For C <sub>13</sub> H <sub>12</sub> NO <sub>4</sub> .Br: C, 47.87 ; H, 3.68 ; N, 4.30.                                                  | 203-205 |
| Br             | H                | <b>3j</b>  | -                                                                                                                                                                    | -                  | Found: C, 45.31 ; H, 3.64 ; N, 4.36. Calc. For C <sub>13</sub> H <sub>12</sub> NO <sub>5</sub> .Br: C, 45.64 ; H, 3.51 ; N, 4.09.                                                  | 189-191 |
| Br             | H                | <b>3l</b>  | -                                                                                                                                                                    | -                  | Found: C, 55.84 ; H, 3.79 ; N, 4.02. Calc. For C <sub>18</sub> H <sub>14</sub> NO <sub>4</sub> .Br: C, 55.68 ; H, 3.61 ; N, 3.61.                                                  | 178-181 |
| Br             | H                | <b>3p</b>  | Found: C, 49.75 ; H, 4.89 ; N, 7.33. Calc. For C <sub>16</sub> H <sub>19</sub> N <sub>2</sub> O <sub>4</sub> .Br.0.01H <sub>2</sub> O: C, 49.91 ; H, 4.99 ; N, 7.28. | 138-141            | -                                                                                                                                                                                  | -       |
